# Supplementary material
Source: PubMed Central journal article supplement (PMC5263061)
Supplement: NIHMS831971-supplement-Related_Manuscript_File.pdf [file NIHMS831971-supplement-Related_Manuscript_File.pdf]

Acknowledgment Permission Form

Journal: Stroke

Manuscript No: 015234

First Author: Andrew Garton

Title of Work: Post-Stroke Posttraumatic Stress Disorder: A Review

Authors must provide written permission/approval from all individuals mentioned by name in the Acknowledgements section of a submitted manuscript. By signing this form, any and all acknowledged persons therefore state that they have read and approved the mention of their names in the Acknowledgment section of the aforementioned paper.

Melissa Ardizzone

Printed Name: Melissa Ardizzone

Signature: M. Ardizzone

Date: 10/7/16

Acknowledgment Permission Form

Journal: Stroke

Manuscript No: 015234

First Author: Andrew Garton

Title of Work: Post-Stroke Posttraumatic Stress Disorder: A Review

Authors must provide written permission/approval from all individuals mentioned by name in the Acknowledgements section of a submitted manuscript. By signing this form, any and all acknowledged persons therefore state that they have read and approved the mention of their names in the Acknowledgment section of the aforementioned paper.

Arlene Hernandez

Printed Name: Arlene Hernandez

Signature: 

Date: 10/6/16

## Acknowledgment Permission Form

Journal: Stroke

Manuscript No: 015234

First Author: Andrew Garton

Title of Work: Post-Stroke Posttraumatic Stress Disorder: A Review

Authors must provide written permission/approval from all individuals mentioned by name in the Acknowledgements section of a submitted manuscript. By signing this form, any and all acknowledged persons therefore state that they have read and approved the mention of their names in the Acknowledgment section of the aforementioned paper.

Johanna Suskin

Printed Name: Johanna Suskin

Signature: 

Date: 10/5/16

Acknowledgment Permission Form

Journal: Stroke

Manuscript No: 015234

First Author: Andrew Garton

Title of Work: Post-Stroke Posttraumatic Stress Disorder: A Review

Authors must provide written permission/approval from all individuals mentioned by name in the Acknowledgements section of a submitted manuscript. By signing this form, any and all acknowledged persons therefore state that they have read and approved the mention of their names in the Acknowledgment section of the aforementioned paper.

Parker Tobia

Printed Name: Parker Tobia

Signature: P. Tobia

Date: 10/4/16
